# Supplementary material
Source: HighWire-hosted journal article supplement (https://gut.bmj.com/content/69/1/42)
Supplement: inline-supplementary-material-1 [file inline-supplementary-material-1.pdf]

## Supplementary Figures

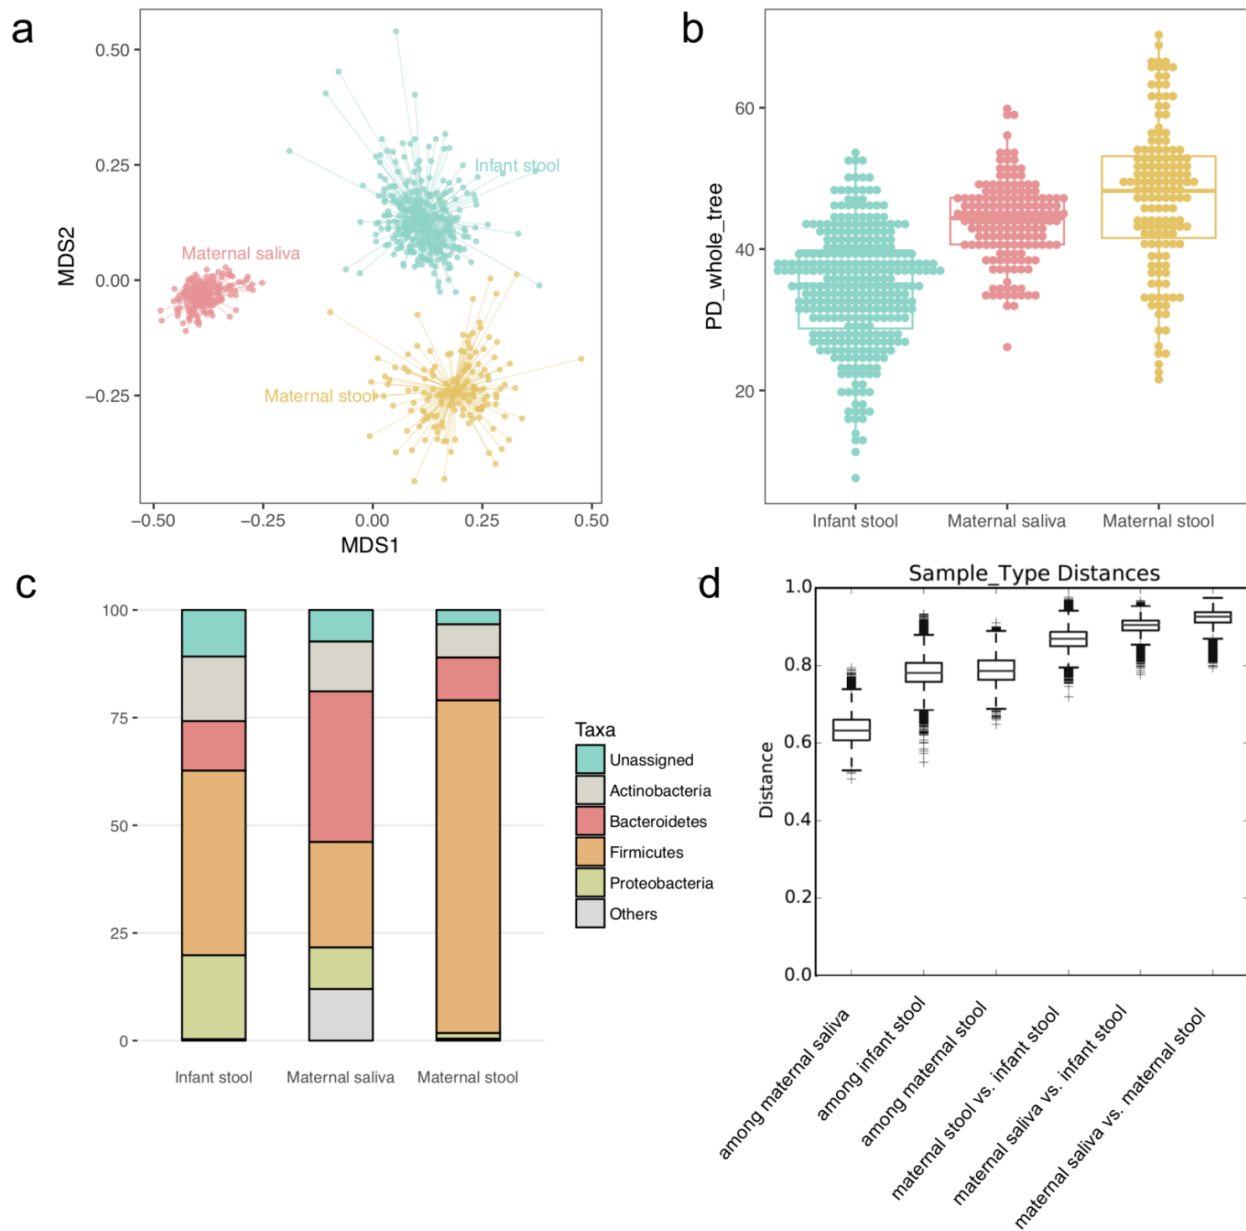

**Supplementary Figure S1.** (a) Dissimilarities by sample type measured using unweighted UniFrac distance matrices and visualized using a non-metric Multidimensional Scaling (NMDS) plot. The PERMANOVA test was carried out with 999 permutations performed using Adonis command in R package [vegan] to test the overall microbiota dissimilarities across sample types ( $p < 0.001$ ). (b) The boxplots showing the mean and variance of the richness of the microbial community in different samples types ( $PD\_whole\_tree$  index was measured on rarefied tables at 1000 sequences per sample). Kruskal Wallis test was performed to compare the microbiota richness measured by  $PD\_whole\_tree$  index between the infant stool, maternal saliva and maternal stool ( $p$ -value  $< 0.0001$ ). (c) Relative abundances at the phylum level, by sample type. (d) UniFrac distances between samples compared using QIIME command `make_distances_boxplots.py` (Bonferroni-corrected  $p$  value = 0.028 for all comparisons).

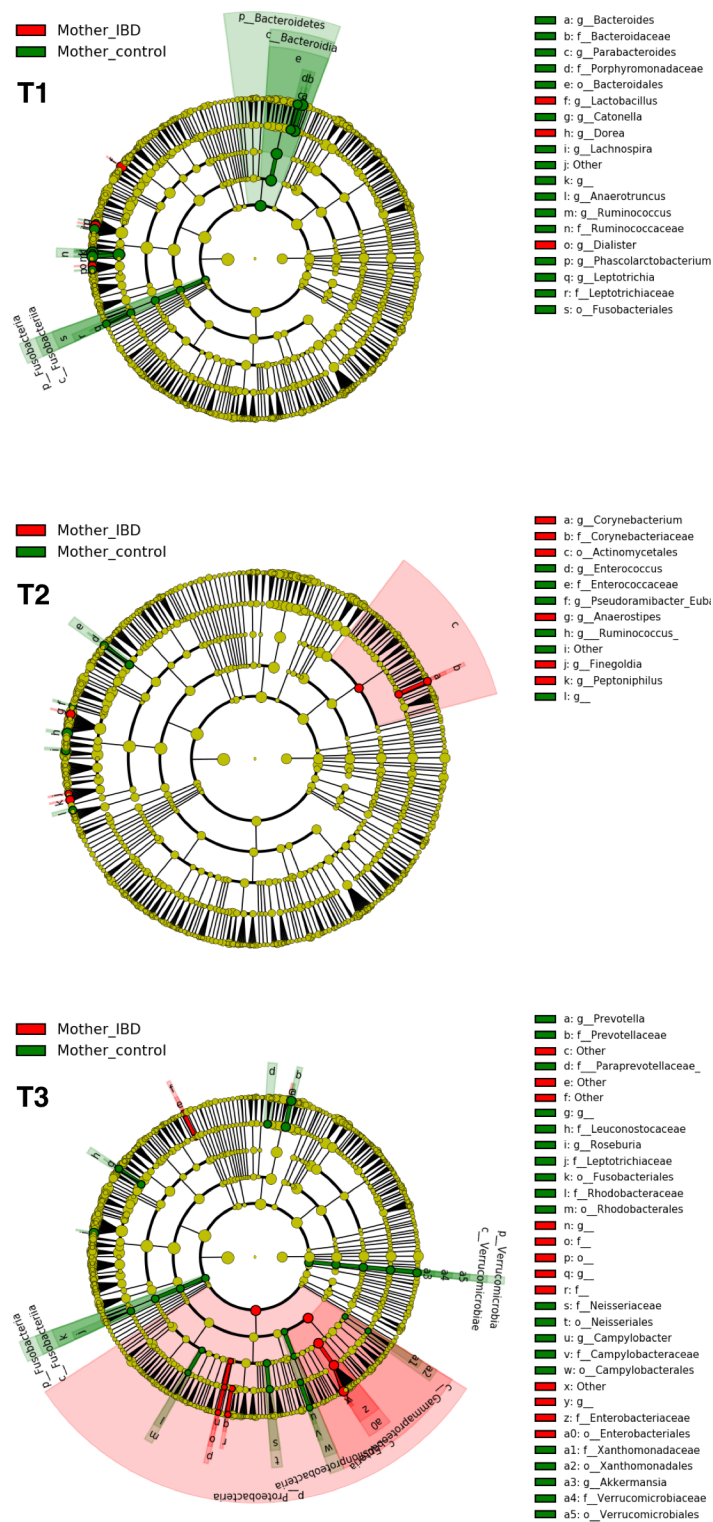

**Supplementary Figure S2.** Differential microbial features between pregnant women with and without IBD at each trimester of pregnancy, as determined by LEfSe analysis (LDA, linear discriminant analysis).

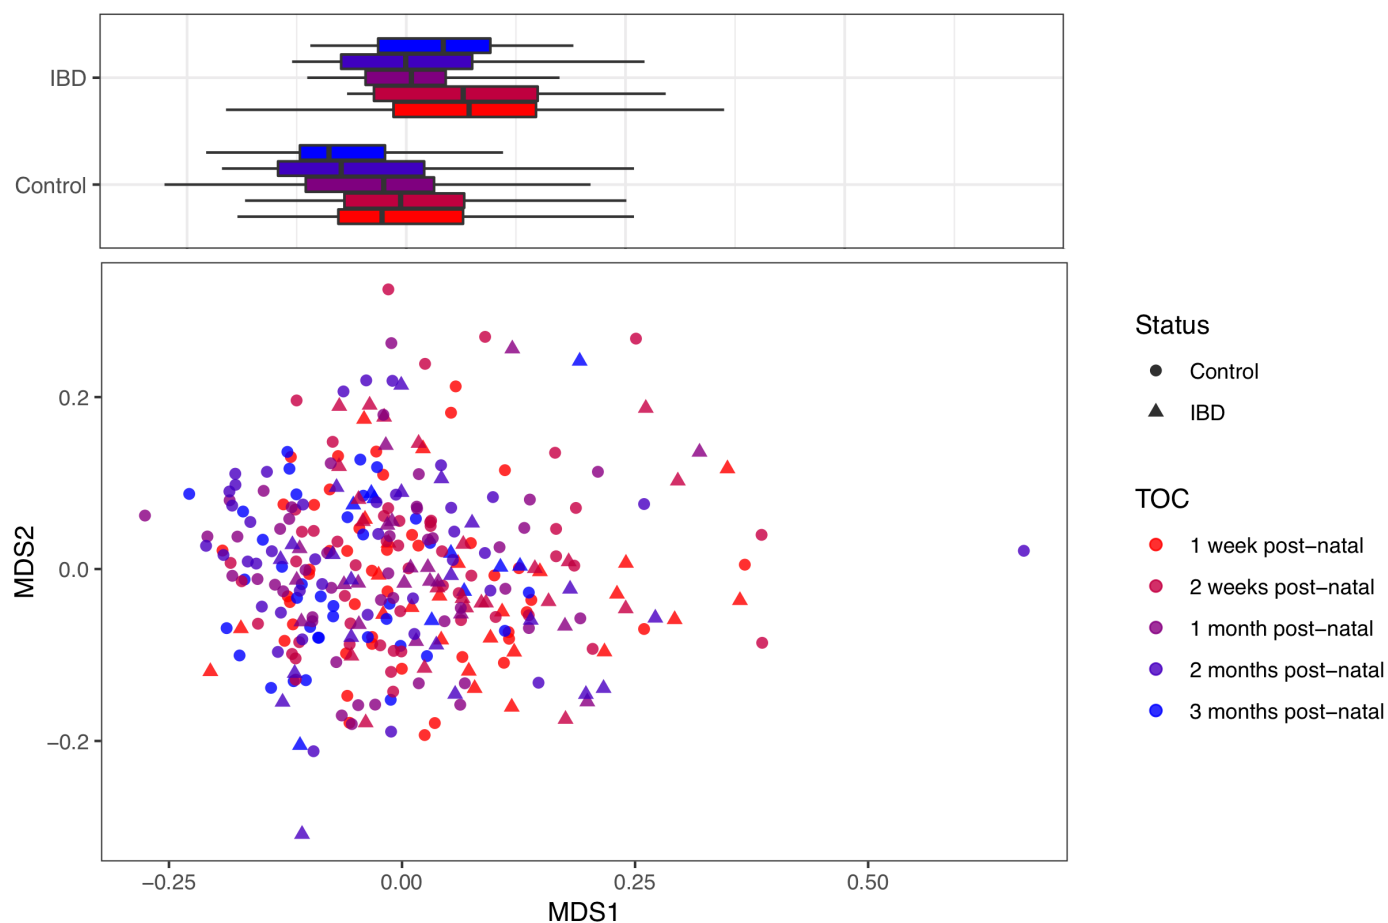

**Supplementary Figure S3.** The MDS plot shows the  $\beta$ -diversity of baby microbiome at various sampling time points by maternal IBD diagnosis: babies born to mothers with IBD (triangle-shaped dots) and control mothers (circle-shaped dots), color-coded by time point. The boxplots show the mean and variance of the  $\beta$ -diversity by IBD status and time points at MDS1.

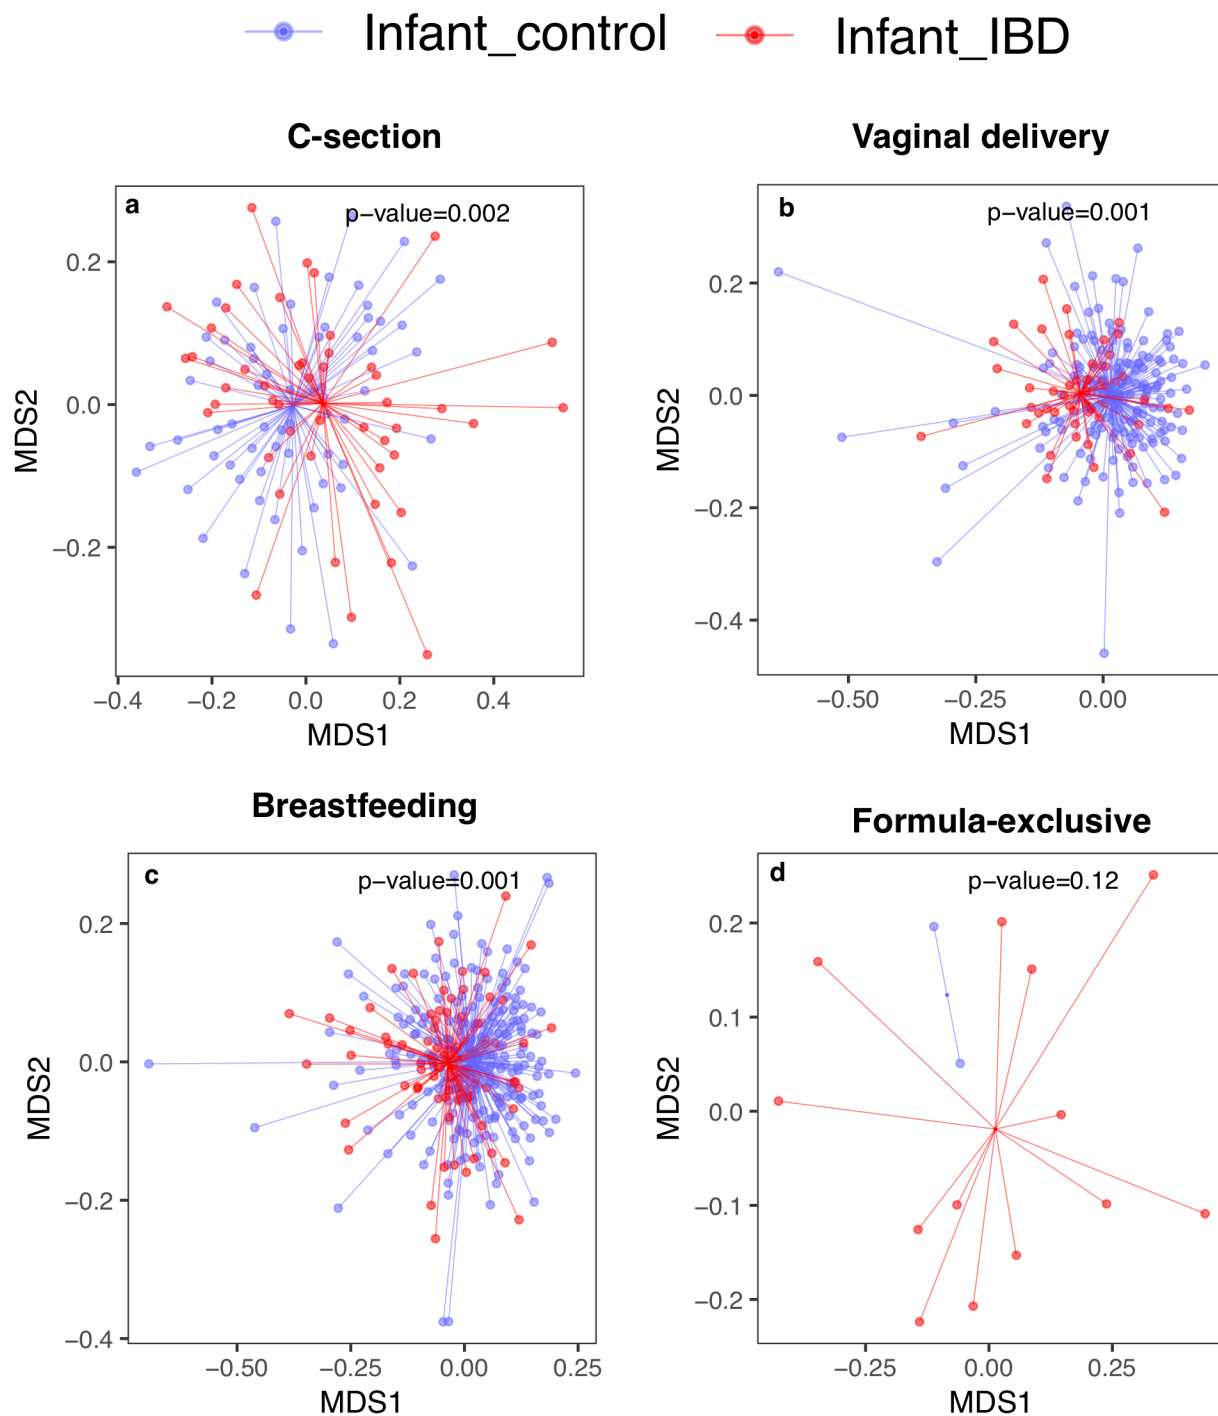

**Supplementary Figure S4. The  $\beta$ -diversity of babies stratified by different exposures and color-coded by maternal IBD diagnosis.** (a) Babies born via Caesarian section only (N= 28); (b) Babies born via vaginal delivery only (N= 51); (c) Babies who received breastfeeding (exclusive or mixed) (N= 73), and (d) Babies who were exclusively formula-fed (N=6). P-values from PERMANOVA test.

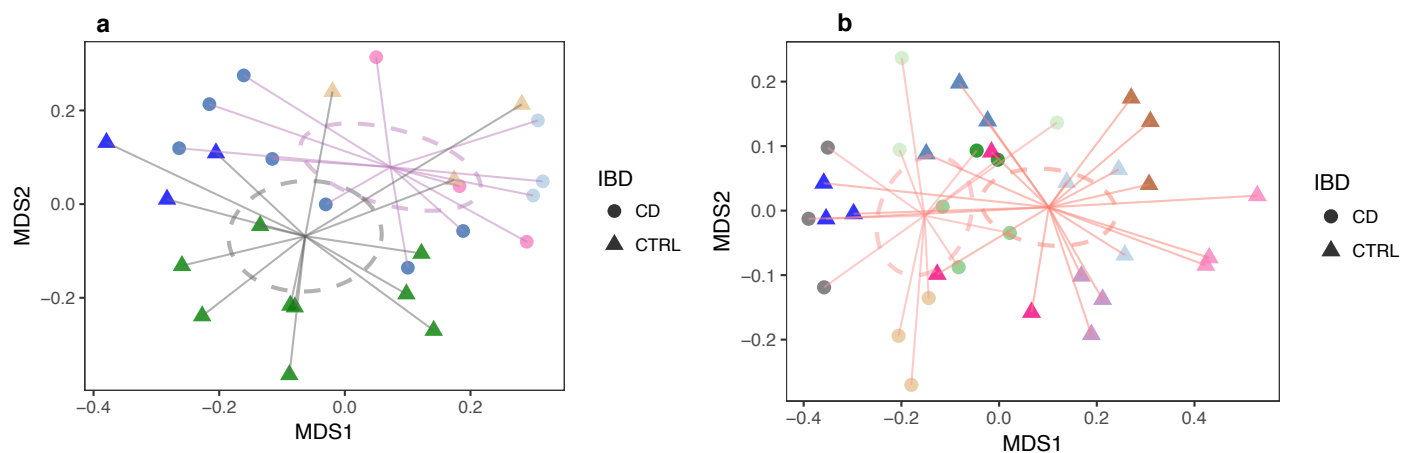

**Supplementary Figure S5. The gut microbiome of GFM mice colonized with maternal stool (a) and baby stool (b).** Stool samples were obtained from the mouse intestine at the time of sacrifice (5 weeks after gavage). The triangles represent bacterial diversity of samples from mice inoculated with stool of control pregnant women or their babies; the circles represent samples from mice inoculated with stool of pregnant Crohn's disease (CD) patients or their babies. Same color coding reflects the same donor. All analyses were adjusted for batch and repeated sampling.

(a) CD3<sup>+</sup> T lymphocyte

Colonic lamina propria

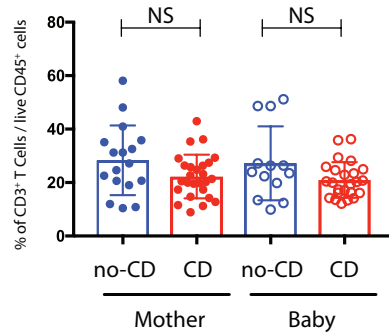

Mesenteric lymph node

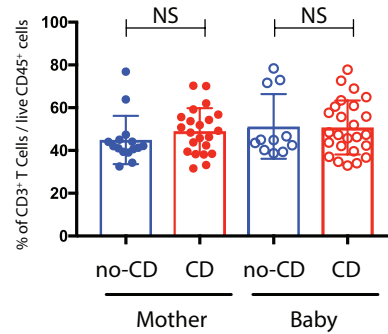

(b) CD4<sup>+</sup> T lymphocyte

Colonic lamina propria

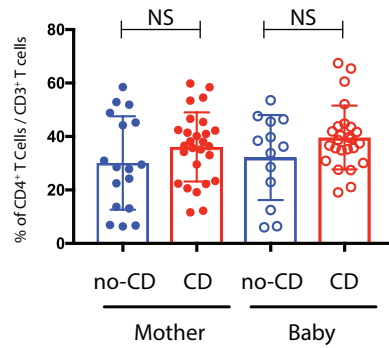

Mesenteric lymph node

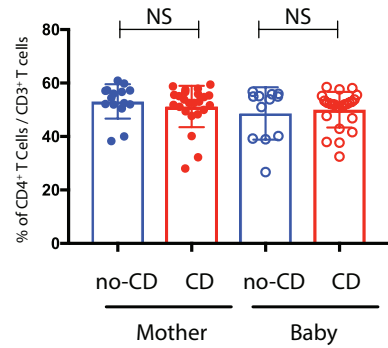

(c) CD19<sup>+</sup> B lymphocyte

Colonic lamina propria

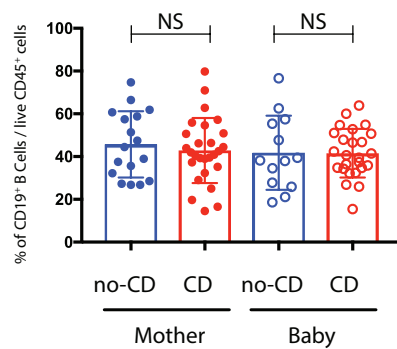

Mesenteric lymph node

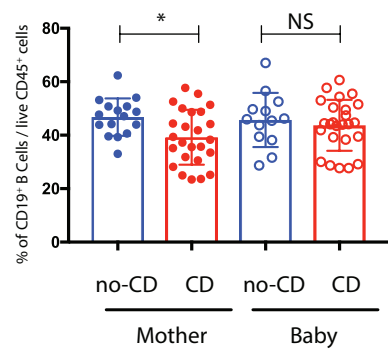

NS non significant

\*p<0.05

**Supplementary Figure S6.** Lymphocyte populations in the colonic lamina propria and mesenteric lymph nodes of GF mice inoculated with the stool of CD and non-CD mothers and their babies. The frequency of CD3<sup>+</sup> T cells (panel a), CD4<sup>+</sup> T cells (panel b) and CD19<sup>+</sup> B cells (panel c) in the colonic lamina propria (left panel) and mesenteric lymph nodes (right panel) are compared between the respective groups.

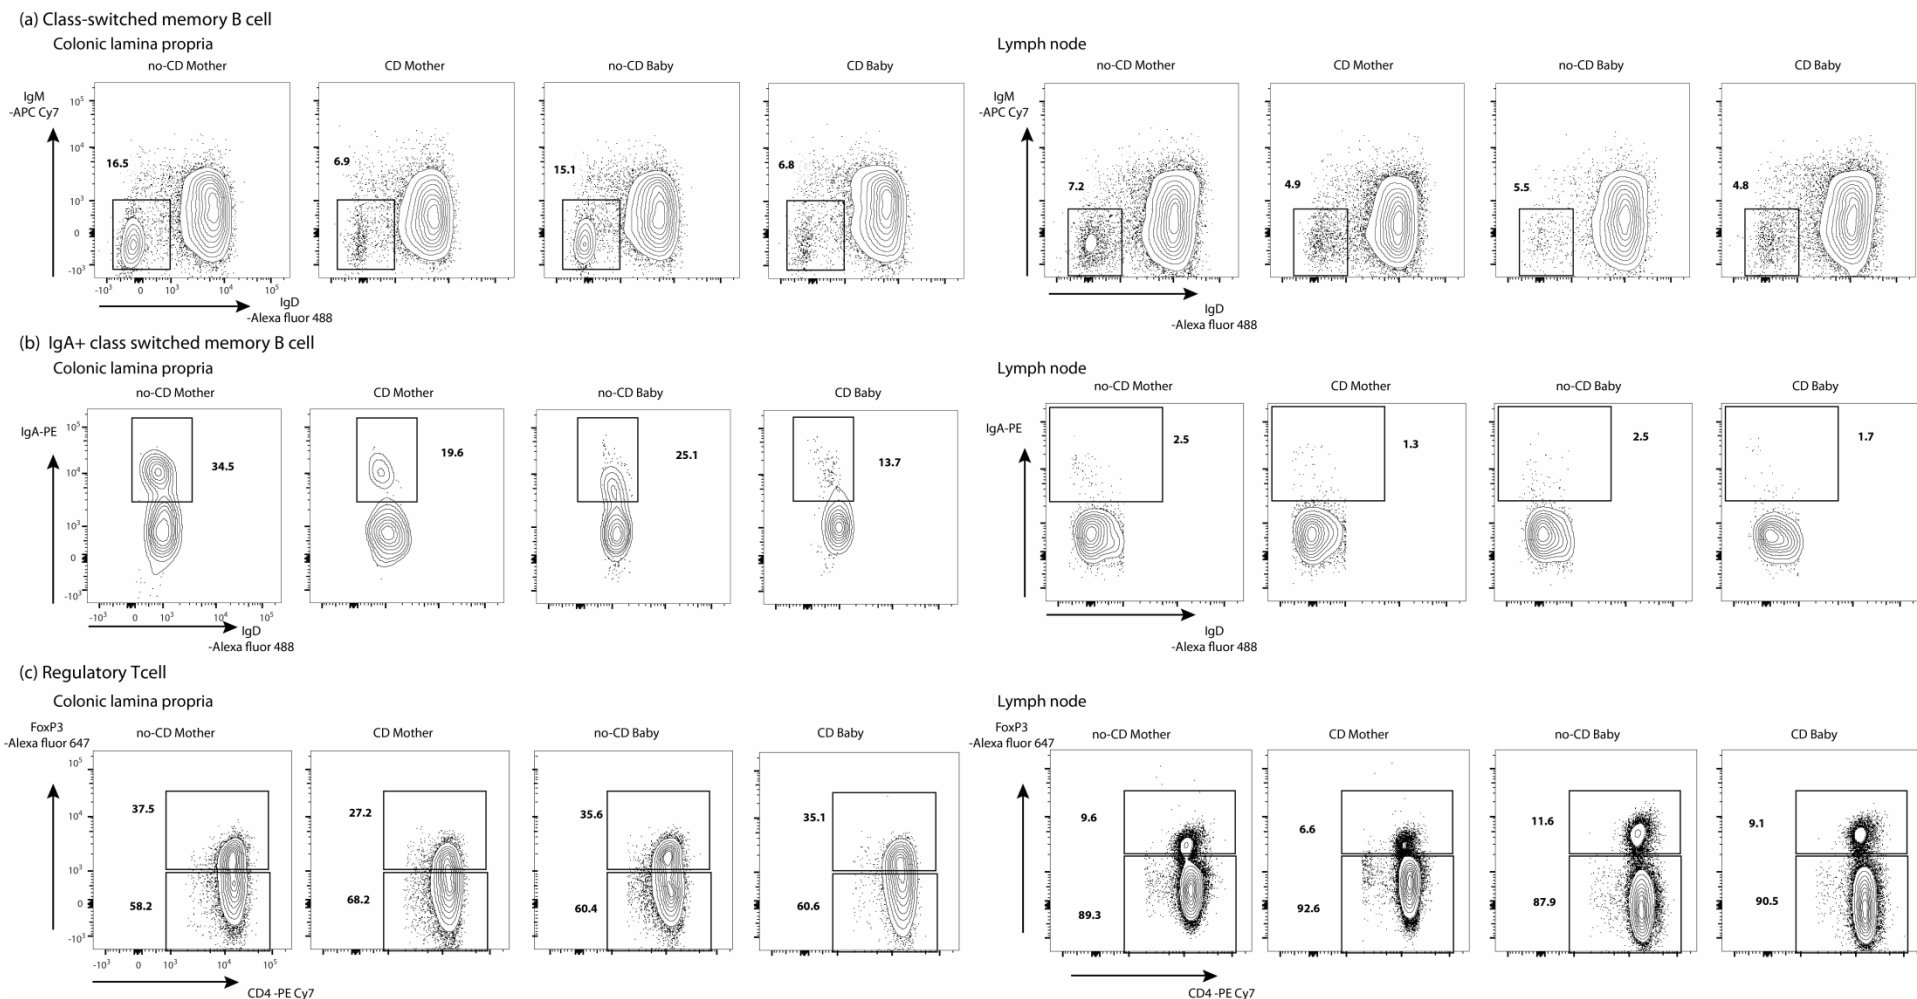

**Supplementary Figure S7. (a)** Class-switched memory B cells (aqua<sup>-</sup>, CD45<sup>+</sup> CD19<sup>+</sup> CD138<sup>-</sup> IgD<sup>-</sup> IgM<sup>+</sup>) isolated from the colonic *lamina propria* (upper row) and MLN (lower row) of germ-free mice, which were inoculated with the stool of control mother, CD mother or their 3-month old babies (control baby or CD-exposed baby). Representative flow plots displaying switched memory B cells in the live CD45<sup>+</sup> CD19<sup>+</sup> CD138<sup>-</sup> B cells from the indicated sample. **(b)** Representative flow plots displaying IgA<sup>+</sup> Class-switched memory B cells (aqua<sup>-</sup>, CD45<sup>+</sup> CD19<sup>+</sup> CD138<sup>-</sup> IgD<sup>-</sup> IgM<sup>+</sup> IgA<sup>+</sup>) cells in the indicated groups. **(c)** Representative flow plots displaying Regulatory T cells (T<sub>REG</sub>) (aqua<sup>-</sup>, CD45<sup>+</sup> CD3<sup>+</sup> CD8<sup>-</sup> CD4<sup>+</sup> FoxP3<sup>+</sup>) in the indicated groups.



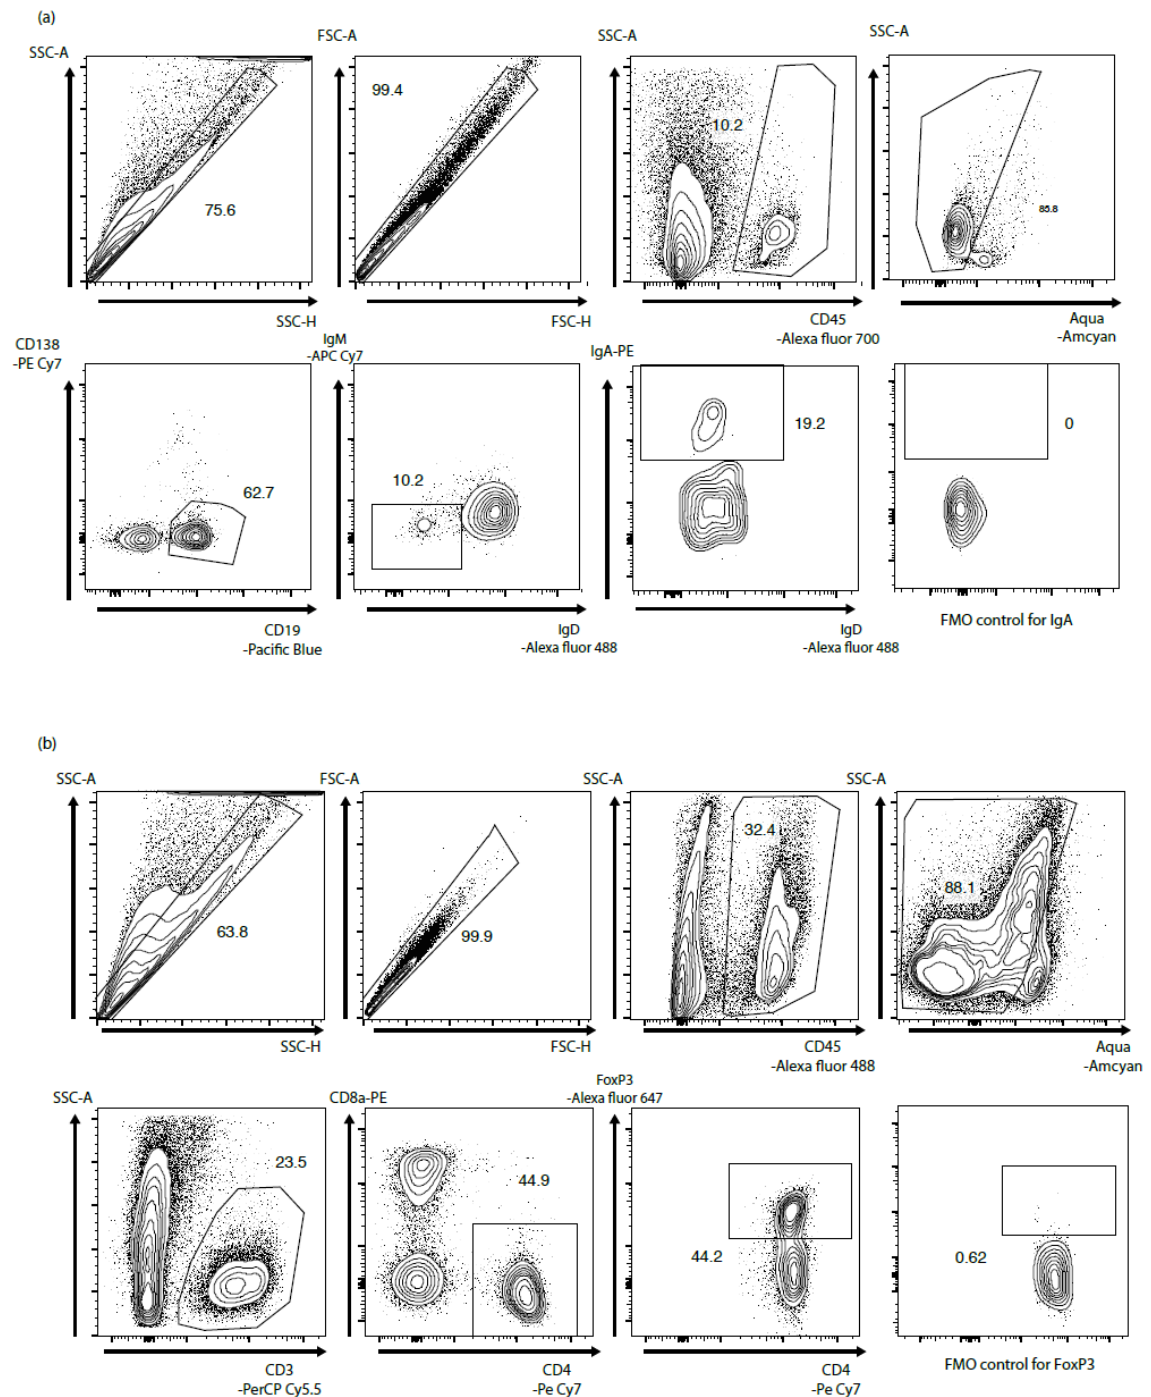

**Supplementary Figure S8. Gating strategy.** (a) Gating strategy to identify class-switched memory B cells. After exclusion of doublets, hematopoietic (CD45<sup>+</sup>) cells were gated for aqua<sup>-</sup> live cells. CD19<sup>+</sup>CD138<sup>-</sup> B cells were further classified as switched memory (IgD<sup>-</sup>IgM<sup>+</sup>) or naïve (IgD<sup>+</sup>IgM<sup>+</sup>) B cells. Switched memory B cells were then examined for IgA expression. (b) Gating strategy to identify regulatory T cells. After exclusion of doublets, live (aqua<sup>-</sup>) CD45<sup>+</sup> hematopoietic cells were gated on CD3<sup>+</sup> T cells. CD3<sup>+</sup>CD4<sup>+</sup> T cells were then examined for the expression of FoxP3 to define regulatory T cells (T<sub>REG</sub>). SSC: Side Scatter; A: area, H: height; FSC: Forward Scatter; FMO: fluorescence minus one.



(a) IgA<sup>+</sup> plasma cells

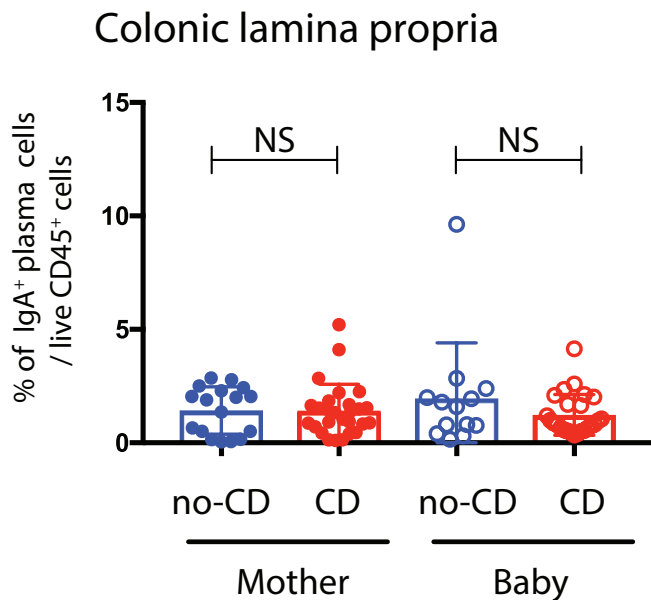

(b) Stool IgA

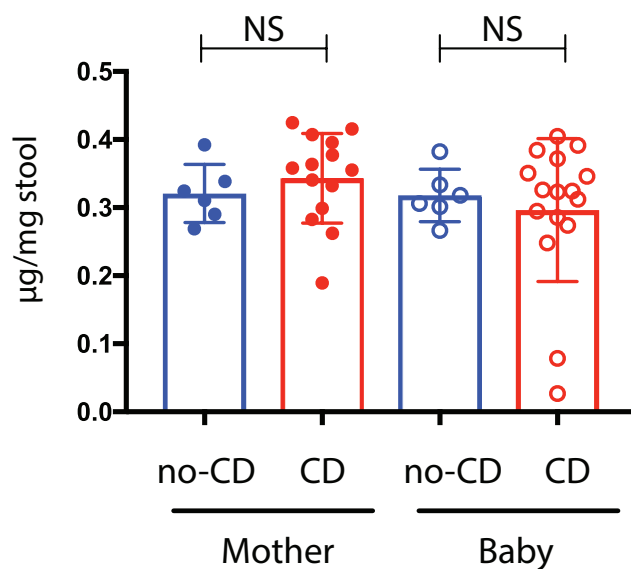

**Supplementary Figure S9.** Quantification of IgA in the colonic lamina propria and stool of GF mice inoculated with the stool of CD and non-CD mothers and their babies. a) Frequency of IgA<sup>+</sup> plasma cells (aqua<sup>+</sup>, CD45<sup>+</sup> CD19<sup>+</sup> CD138<sup>+</sup> IgA<sup>+</sup>) in the colonic lamina propria is compared between the respective groups; b) IgA levels per mg of stool are compared between the respective groups.

## Supplementary Tables

**Supplementary Table S1:** Main features of donors for GFM experiments

| Donor            | Family Type | Type of IBD | Medications        | Type of delivery | Feeding type throughout study period | Antibiotic exposure after birth (baby) |
|------------------|-------------|-------------|--------------------|------------------|--------------------------------------|----------------------------------------|
| <b>Mother_1</b>  | Control     | NA          | NA                 | Vaginal          | NA                                   | NA                                     |
| <b>Baby_1</b>    | Control     | NA          | NA                 | Vaginal          | Mixed                                | No                                     |
| <b>Mother_2</b>  | Control     | NA          | NA                 | Vaginal          | NA                                   | NA                                     |
| <b>Baby_2</b>    | Control     | NA          | NA                 | Vaginal          | Mixed                                | No                                     |
| <b>Mother_3</b>  | Control     | NA          | NA                 | Vaginal          | NA                                   | NA                                     |
| <b>Baby_3</b>    | Control     | NA          | NA                 | Vaginal          | Exclusively Breastfed                | No                                     |
| <b>Mother_4</b>  | IBD         | CD          | Adalimumab         | Vaginal          | NA                                   | NA                                     |
| <b>Baby_4</b>    | IBD         | CD          | NA                 | Vaginal          | Exclusively Breastfed                | No                                     |
| <b>Mother_5</b>  | IBD         | CD          | Infliximab         | Vaginal          | NA                                   | NA                                     |
| <b>Baby_5</b>    | IBD         | CD          | NA                 | Vaginal          | Mixed                                | Yes                                    |
| <b>Mother_6</b>  | IBD         | CD          | None               | Vaginal          | NA                                   | NA                                     |
| <b>Baby_6</b>    | IBD         | CD          | NA                 | Vaginal          | Exclusively Breastfed                | No                                     |
| <b>Mother_7</b>  | IBD         | CD          | Infliximab         | C-section        | NA                                   | NA                                     |
| <b>Baby_7</b>    | IBD         | CD          | NA                 | C-section        | Mixed                                | No                                     |
| <b>Mother_8</b>  | IBD         | CD          | Infliximab, 5-ASA  | C-section        | NA                                   | NA                                     |
| <b>Baby_8</b>    | IBD         | CD          | NA                 | C-section        | Mixed                                | No                                     |
| <b>Mother_9</b>  | IBD         | CD          | None               | C-section        | NA                                   | NA                                     |
| <b>Baby_9</b>    | IBD         | CD          | NA                 | C-section        | Exclusively Breastfed                | No                                     |
| <b>Mother_10</b> | IBD         | CD          | Infliximab, 5-ASA  | Vaginal          | NA                                   | NA                                     |
| <b>Baby_10</b>   | IBD         | CD          | NA                 | Vaginal          | Exclusively Breastfed                | No                                     |
| <b>Mother_11</b> | IBD         | CD          | Ustekinumab, 5-ASA | Vaginal          | NA                                   | NA                                     |
| <b>Baby_11</b>   | IBD         | CD          | NA                 | Vaginal          | Exclusively Breastfed                | No                                     |

NA: not applicable

**Supplementary Table S2: List of Antibodies**

| Antibodies for ILC1 |              |         |          |                |                |             |
|---------------------|--------------|---------|----------|----------------|----------------|-------------|
| antibody            | fluorescence | clone   | dilution | manufacture    | catalog number | lot number  |
| <b>aqua</b>         | Amcyan       | L34957  | 1:500    | Thermo Fischer | L34957         | 1913927     |
| <b>CD45</b>         | A700         | 30-F11  | 1:200    | Biolegend      | 103127         | B241345     |
| <b>CD3</b>          | PB           | 17A2    | 1:200    | Biolegend      | 100214         | B227246     |
| <b>CD19</b>         | PB           | 6D5     | 1:200    | Biolegend      | 115523         | B203467     |
| <b>Gr-1</b>         | PB           | RB6-8C5 | 1:200    | Biolegend      | 127611         | B200366     |
| <b>CD90.2</b>       | APC cy7      | 30-H12  | 1:200    | Biolegend      | 105328         | B241601     |
| <b>Sca1</b>         | A647         | D7      | 1:200    | Biolegend      | 108118         | B236557     |
| <b>CD127</b>        | PE           | A7R34   | 1:200    | Biolegend      | 135011         | B265436     |
| <b>NK1.1</b>        | PerCP        | PK136   | 1:200    | Biolegend      | 108725         | B121189     |
| <b>IFN-g</b>        | PE-cy7       | XMG1.2  | 1:200    | eBioscience    | 25-7311-82     | E07672-1630 |
| <b>CD11b</b>        | A488         | M1/70   | 1:200    | Biolegend      | 101217         | B214936     |

| Antibodies for ILC2 and 3 |              |          |          |                |                |             |
|---------------------------|--------------|----------|----------|----------------|----------------|-------------|
| antibody                  | fluorescence | clone    | dilution | manufacture    | catalog number | lot number  |
| <b>aqua</b>               | amcyan       | L34957   | 1:500    | Thermo Fischer | L34957         | 1913927     |
| <b>CD45</b>               | A700         | 30-F11   | 1:200    | Biolegend      | 103127         | B241345     |
| <b>CD3</b>                | PB           | 17A2     | 1:200    | Biolegend      | 100214         | B227246     |
| <b>CD19</b>               | PB           | 6D5      | 1:200    | Biolegend      | 115523         | B203467     |
| <b>CD11b</b>              | PB           | M1/70    | 1:200    | Biolegend      | 101223         | B225174     |
| <b>Gr-1 (Ly6G)</b>        | PB           | RB6-8C5  | 1:200    | Biolegend      | 127611         | B200366     |
| <b>IL-22</b>              | PerCP        | Poly5164 | 1:200    | Biolegend      | 516411         | B223419     |
| <b>CD90.2</b>             | APC cy7      | 30-H12   | 1:200    | Biolegend      | 105328         | B241601     |
| <b>IL-5</b>               | PE           | TRFK5    | 1:200    | Biolegend      | 504303         | B196326     |
| <b>CD127</b>              | APC          | A7R34    | 1:200    | Biolegend      | 135011         | B265436     |
| <b>IL-17</b>              | A488         | ebio17B7 | 1:200    | eBioscience    | 53-7177-81     | E08894-1630 |

| Antibodies for DC   |              |             |          |                |                |            |
|---------------------|--------------|-------------|----------|----------------|----------------|------------|
| antibody            | fluorescence | clone       | dilution | manufacture    | catalog number | lot number |
| <b>aqua</b>         | amcyan       | L34957      | 1:500    | Thermo Fischer | L34957         | 1913927    |
| <b>CD45</b>         | PerCP        | 30-F11      | 1:200    | Biolegend      | 103127         | B241345    |
| <b>MHC2/I-A/I-E</b> | a700         | M5/114.15.2 | 1:200    | Biolegend      | 107622         | B264454    |
| <b>CD11c</b>        | PEcy7        | N418        | 1:200    | Biolegend      | 117318         | B222652    |
| <b>CD103</b>        | PE           | M290        | 1:200    | BD             | 557495         | 4024700    |
| <b>CD11b</b>        | A488         | M1/70       | 1:200    | Biolegend      | 101217         | B214936    |
| <b>F4/80</b>        | PB           | BM8         | 1:200    | Biolegend      | 123123         | B217177    |

**Supplementary Table S3.** The main clinical features of participants with Crohn's disease and ulcerative colitis compared using t-test (for continuous traits) and  $\chi^2$  test (for categorical variables).

| Clinical features                                                       | Pregnant women with Crohn's disease | Pregnant women with Ulcerative Colitis | p-value |
|-------------------------------------------------------------------------|-------------------------------------|----------------------------------------|---------|
| <b>N</b>                                                                | 19                                  | 21                                     | -       |
| <b>Mean age at recruitment (y)</b>                                      | 33±3.6                              | 34.3±3.9                               | 0.3     |
| <b>Jewish ethnicity (%)</b>                                             | 37%                                 | 33%                                    | 0.62    |
| <b>Nulliparous (%)</b>                                                  | 63%                                 | 62%                                    | 0.94    |
| <b>Disease Location (Montreal classification) (%)</b>                   | L1: 26%<br>L2: 37%<br>L3: 37%       | E1: 25%<br>E2: 40%<br>E3: 35%          | -       |
| <b>Non-complicated behaviour (non-stricturing, non-penetrating) (%)</b> | 74%                                 | -                                      | -       |
| <b>Perianal disease (%)</b>                                             | 36%                                 | -                                      | -       |
| <b>Peripartum antibiotics (%)</b>                                       | 77%                                 | 56%                                    | 0.43    |
| <b>Exposure to antibiotics during pregnancy (%)</b>                     | 21%                                 | 20%                                    | 1       |
| <b>Treatment with aminosalicylates (%)</b>                              | 22%                                 | 61%                                    | 0.017   |
| <b>Treatment with biologic drugs* (%)</b>                               | 74%                                 | 31%                                    | 0.003   |
| <b>Treatment with thiopurines (%)</b>                                   | 9%                                  | 44%                                    | 0.017   |
| <b>Use of assisted reproductive technology (%)</b>                      | 10%                                 | 18%                                    | 0.64    |
| <b>Gestational diabetes/Type1 DM (%)</b>                                | 12%                                 | 0%                                     | 0.23    |
| <b>Prior intestinal surgery (%)</b>                                     | 32%                                 | 0%                                     | 0.02    |
| <b>Disease remission during pregnancy (%)</b>                           | 79%                                 | 62%                                    | 0.24    |

\*In 60% of women treated with biologics, the last infusion before delivery was scheduled to occur during the 25<sup>th</sup>-33<sup>rd</sup> week of pregnancy. L1: ileal disease location; L2: colonic disease location; L3: ileo-colonic disease location; E1: proctitis; E2: left-sided colitis; E3: extensive colitis
